# Supplementary material for: Solubility modelling, solution thermodynamics and preferential solvation of hymecromone in binary solvent mixtures of N,N-dimethylformamide + methanol, ethanol or n-propanol
Source: Royal Society of Chemistry journal article supplement (doi:10.1039/c7ra07587a), 2017-01-01
Supplement: c7ra07587a1.pdf [file c7ra07587a1.pdf]

**Supporting information**

**Solubility modeling, solution thermodynamics and preferential solvation of hymecromone in binary solvent mixtures of *N,N*-dimethylformamide + (methanol, ethanol and *n*-propanol)**

Xinbao Li<sup>a</sup>, Jiao Chen<sup>b</sup>, Gaoquan Chen<sup>b</sup> and Hongkun Zhao<sup>b,\*</sup>

<sup>a</sup> *School of Environmental & Municipal Engineering, North China University of Water Resources and Electric Power, ZhengZhou, He'nan 450011, People's Republic of China*

<sup>b</sup> *College of Chemistry & Chemical Engineering, YangZhou University, YangZhou, Jiangsu 225002, People's Republic of China*

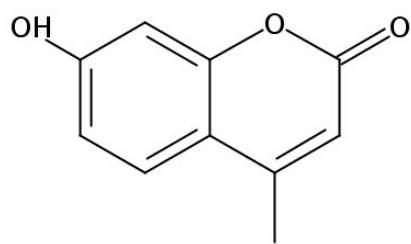

**Fig. S1.** Chemical structure of hymecromone.

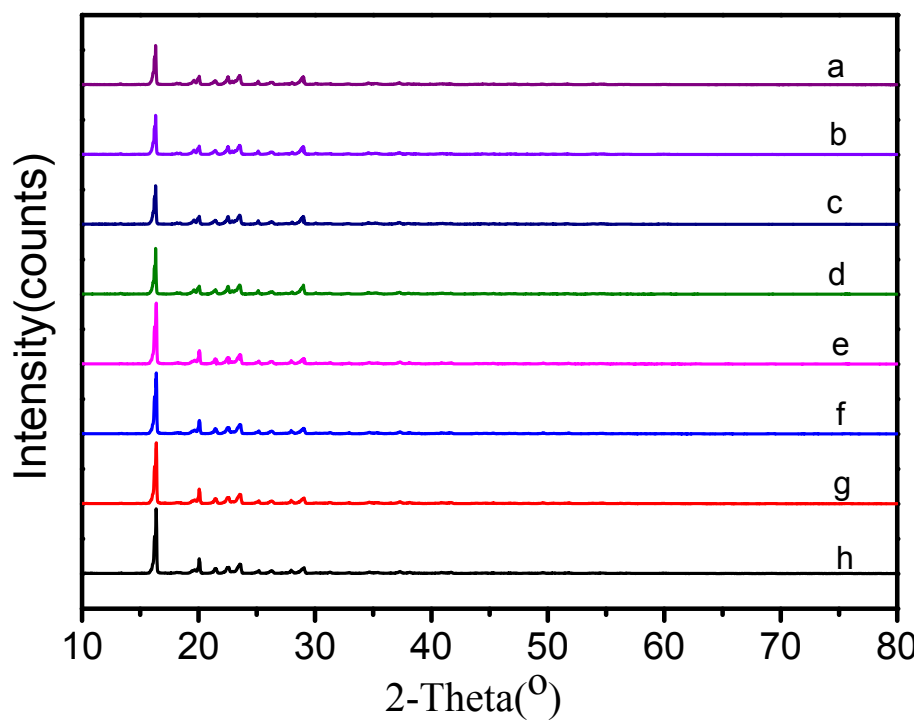

**Fig. S2.** XRD patterns of hymecromone: (a) raw material; (b) crystallized in neat methanol; (c) crystallized in neat ethanol; (d) crystallized in neat *n*-propanol; (e) crystallized in neat DMF; (f) crystallized in DMF + methanol mixture; (g) crystallized in DMF + ethanol mixture; (h) crystallized in DMF + *n*-propanol mixture.

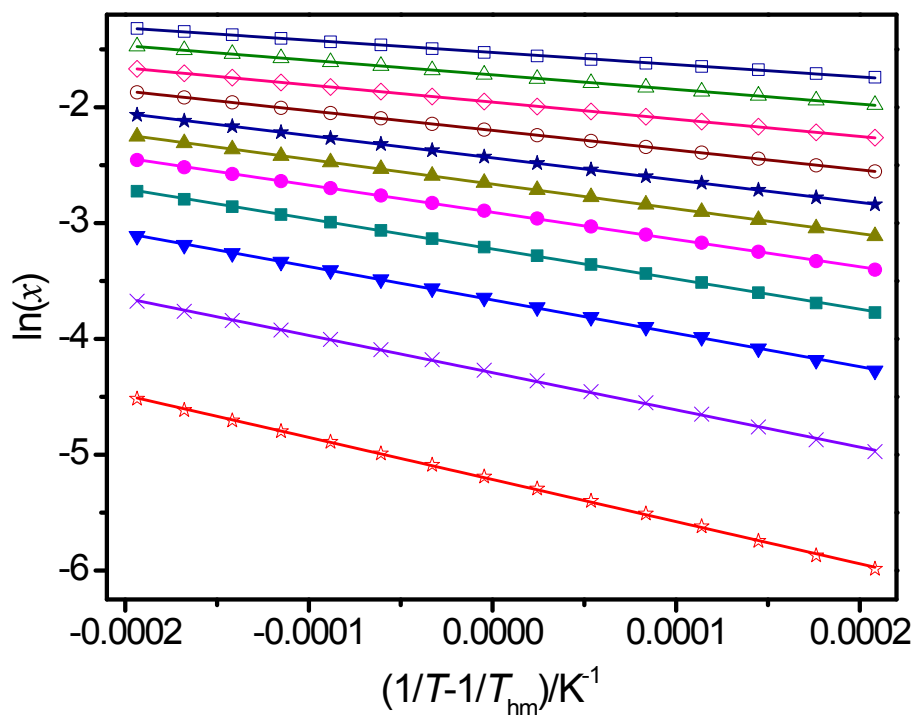

**Fig. S3.** Van't Hoff plots of the mole fraction solubility ( $\ln(x)$ ) of hymecromone in DMF ( $w$ ) + methanol ( $1-w$ ) mixed solutions versus  $(1/T-1/T_{hm})$  with a straight line to correlate the data:  $\star$ ,  $w=0$ ;  $\times$ ,  $w=0.0999$ ;  $\blacktriangledown$ ,  $w=0.1997$ ;  $\blacksquare$ ,  $w=0.2996$ ;  $\bullet$ ,  $w=0.3995$ ;  $\blacktriangle$ ,  $w=0.4968$ ;  $\star$ ,  $w=0.5940$ ;  $\circ$ ,  $w=0.6969$ ;  $\diamond$ ,  $w=0.7998$ ;  $\triangle$ ,  $w=0.8999$ ;  $\square$ ,  $w=1$ .

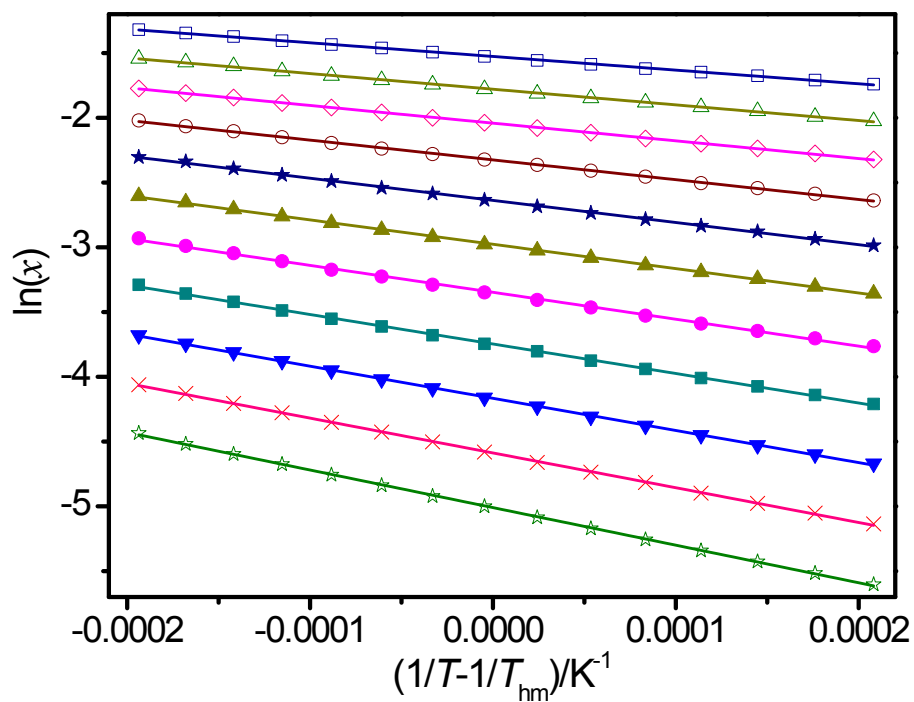

**Fig. S4.** Van't Hoff plots of the mole fraction solubility ( $\ln(x)$ ) of hymecromone in DMF ( $w$ ) + ethanol ( $1-w$ ) mixed solutions versus  $(1/T-1/T_{hm})$  with a straight line to correlate the data: ☆,  $w=0$ ; ×,  $w=0.0999$ ; ▼,  $w=0.1999$ ; ■,  $w=0.3001$ ; ●,  $w=0.4002$ ; ▲,  $w=0.4999$ ; ★,  $w=0.5997$ ; ○,  $w=0.6998$ ; ◇,  $w=0.8000$ ; △,  $w=0.9000$ ; □,  $w=1$ .

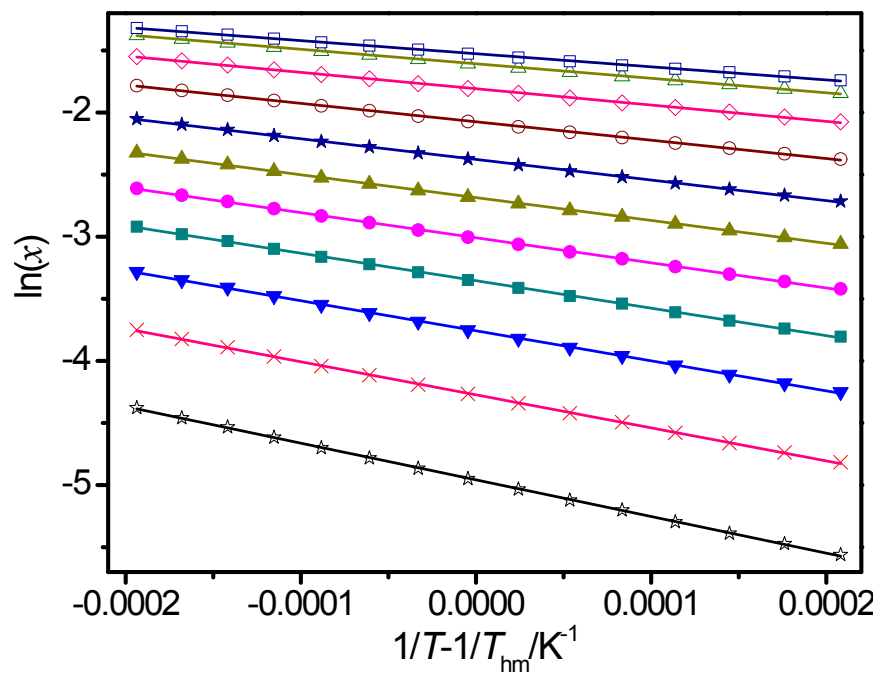

**Fig. S5.** Van't Hoff plots of the mole fraction solubility ( $\ln(x)$ ) of hymecromone in DMF ( $w$ ) +  $n$ -propanol ( $1-w$ ) mixed solutions versus  $(1/T-1/T_{hm})$  with a straight line to correlate the data:  $\star$ ,  $w=0$ ;  $\times$ ,  $w=0.0999$ ;  $\blacktriangledown$ ,  $w=0.1997$ ;  $\blacksquare$ ,  $w=0.2995$ ;  $\bullet$ ,  $w=0.3993$ ;  $\blacktriangle$ ,  $w=0.5001$ ;  $\blackstar$ ,  $w=0.6008$ ;  $\circ$ ,  $w=0.6999$ ;  $\diamond$ ,  $w=0.7990$ ;  $\triangle$ ,  $w=0.8995$ ;  $\square$ ,  $w=1$ .

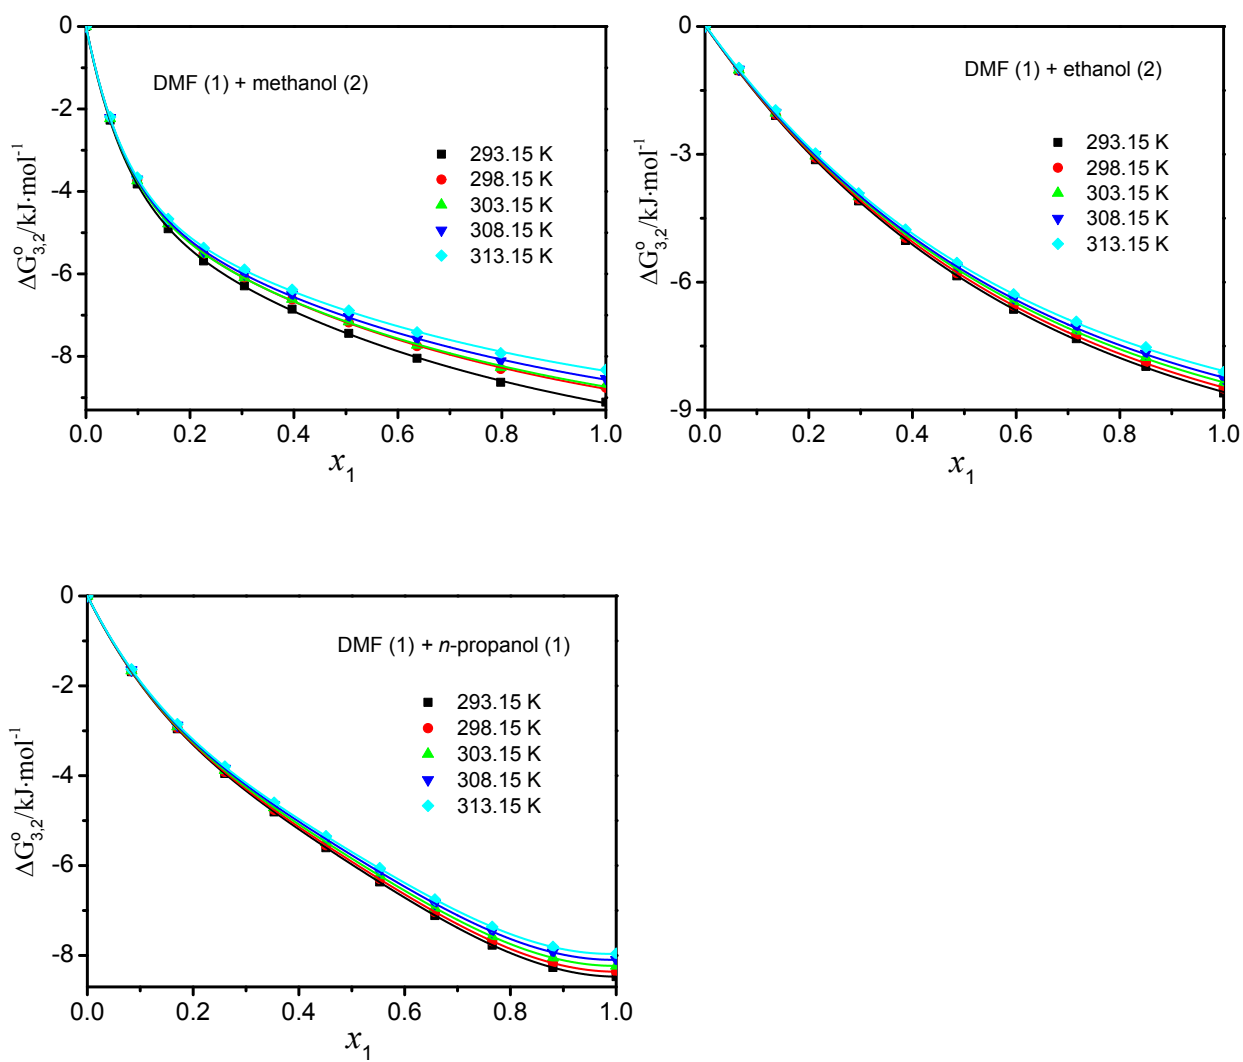

**Fig. S6.** Gibbs energy of transfer ( $\text{kJ}\cdot\text{mol}^{-1}$ ) of hymecromone (3) from neat alcohol (2) to DMF (1) + methanol (2), DMF (1) + ethanol (2) and DMF (1) + *n*-propanol (2) mixtures at several temperatures.

**Table S1** Experimental mole fraction solubility ( $x_{T,w}^e \cdot 10^2$ ) of hymecromone in mixed solvent of DMF ( $w$ ) + methanol ( $1-w$ ) with various mass fractions within the temperature range from  $T/K = (278.15$  to  $313.15)$  under  $p=101.1$  kPa.<sup>a</sup>

| $T/K$  | $w$    |        |        |        |        |        |        |        |        |        |       | $x^{idl}$ |
|--------|--------|--------|--------|--------|--------|--------|--------|--------|--------|--------|-------|-----------|
|        | 0      | 0.0999 | 0.1997 | 0.2996 | 0.3995 | 0.4968 | 0.5940 | 0.6969 | 0.7998 | 0.8999 | 1     |           |
| 278.15 | 0.2513 | 0.6918 | 1.393  | 2.299  | 3.329  | 4.451  | 5.849  | 7.776  | 10.41  | 13.82  | 17.55 | 2.159     |
| 280.65 | 0.2822 | 0.7663 | 1.526  | 2.496  | 3.585  | 4.759  | 6.210  | 8.196  | 10.90  | 14.36  | 18.11 | 2.311     |
| 283.15 | 0.3199 | 0.8563 | 1.685  | 2.730  | 3.886  | 5.118  | 6.628  | 8.678  | 11.45  | 14.97  | 18.73 | 2.472     |
| 285.65 | 0.3627 | 0.9565 | 1.860  | 2.980  | 4.202  | 5.488  | 7.048  | 9.149  | 11.96  | 15.51  | 19.25 | 2.642     |
| 288.15 | 0.4052 | 1.055  | 2.029  | 3.221  | 4.506  | 5.843  | 7.453  | 9.606  | 12.47  | 16.05  | 19.79 | 2.823     |
| 290.65 | 0.4517 | 1.161  | 2.212  | 3.483  | 4.836  | 6.232  | 7.899  | 10.12  | 13.05  | 16.69  | 20.45 | 3.015     |
| 293.15 | 0.5024 | 1.275  | 2.406  | 3.757  | 5.179  | 6.631  | 8.353  | 10.63  | 13.62  | 17.31  | 21.08 | 3.217     |
| 295.65 | 0.5575 | 1.398  | 2.612  | 4.047  | 5.540  | 7.050  | 8.828  | 11.16  | 14.22  | 17.95  | 21.74 | 3.432     |
| 298.15 | 0.6170 | 1.530  | 2.832  | 4.355  | 5.922  | 7.493  | 9.330  | 11.73  | 14.85  | 18.65  | 22.46 | 3.658     |
| 300.65 | 0.6805 | 1.669  | 3.063  | 4.675  | 6.318  | 7.951  | 9.847  | 12.31  | 15.50  | 19.36  | 23.20 | 3.898     |
| 303.15 | 0.7524 | 1.823  | 3.314  | 5.018  | 6.734  | 8.422  | 10.37  | 12.88  | 16.12  | 20.00  | 23.82 | 4.151     |
| 305.65 | 0.8248 | 1.977  | 3.565  | 5.361  | 7.152  | 8.899  | 10.90  | 13.47  | 16.77  | 20.70  | 24.54 | 4.418     |
| 308.15 | 0.9050 | 2.147  | 3.840  | 5.736  | 7.608  | 9.419  | 11.48  | 14.12  | 17.48  | 21.48  | 25.34 | 4.700     |
| 310.65 | 0.9900 | 2.324  | 4.123  | 6.115  | 8.064  | 9.931  | 12.04  | 14.73  | 18.15  | 22.18  | 26.04 | 4.998     |
| 313.15 | 1.092  | 2.535  | 4.455  | 6.556  | 8.585  | 10.51  | 12.67  | 15.40  | 18.86  | 22.90  | 26.73 | 5.312     |

<sup>a</sup> Standard uncertainties  $u$  are  $u(T) = 0.02$  K,  $u(p) = 0.45$  kPa; Relative standard uncertainty  $u_r$  is  $u_r(x) = 0.026$ .

Solvent mixtures were prepared by mixing different masses of the solvents with relative standard uncertainty  $u_r(w) = 0.0002$ .  $w$  represents the mass fraction of DMF in mixed solvents of DMF + methanol.



**Table S2** Experimental mole fraction solubility ( $x_{T,w}^e \cdot 10^2$ ) of hymecromone in mixed solvent of DMF ( $w$ ) + ethanol ( $1-w$ ) with various mass fractions within the temperature range from  $T/K = (278.15$  to  $313.15)$  under  $p=101.1$  kPa.<sup>a</sup>

| $T/K$  | $w$    |        |        |        |        |        |        |        |        |        |       | $x^{idl}$ |
|--------|--------|--------|--------|--------|--------|--------|--------|--------|--------|--------|-------|-----------|
|        | 0      | 0.0999 | 0.1999 | 0.3001 | 0.4002 | 0.4999 | 0.5997 | 0.6998 | 0.8000 | 0.9000 | 1     |           |
| 278.15 | 0.3689 | 0.5885 | 0.9381 | 1.485  | 2.321  | 3.484  | 5.051  | 7.149  | 9.809  | 13.19  | 17.55 | 2.159     |
| 280.65 | 0.4022 | 0.6397 | 1.007  | 1.592  | 2.466  | 3.673  | 5.310  | 7.526  | 10.28  | 13.64  | 18.11 | 2.311     |
| 283.15 | 0.4400 | 0.6893 | 1.081  | 1.701  | 2.609  | 3.898  | 5.626  | 7.861  | 10.68  | 14.26  | 18.73 | 2.472     |
| 285.65 | 0.4787 | 0.746  | 1.168  | 1.815  | 2.763  | 4.111  | 5.877  | 8.173  | 11.08  | 14.70  | 19.25 | 2.642     |
| 288.15 | 0.5213 | 0.8101 | 1.256  | 1.946  | 2.938  | 4.333  | 6.181  | 8.589  | 11.53  | 15.23  | 19.79 | 2.823     |
| 290.65 | 0.5678 | 0.8772 | 1.347  | 2.075  | 3.129  | 4.590  | 6.488  | 8.993  | 12.06  | 15.75  | 20.45 | 3.015     |
| 293.15 | 0.6184 | 0.9456 | 1.457  | 2.231  | 3.316  | 4.857  | 6.825  | 9.411  | 12.50  | 16.32  | 21.08 | 3.217     |
| 295.65 | 0.6736 | 1.025  | 1.560  | 2.363  | 3.515  | 5.093  | 7.178  | 9.804  | 13.03  | 16.89  | 21.74 | 3.432     |
| 298.15 | 0.7290 | 1.108  | 1.678  | 2.525  | 3.730  | 5.387  | 7.539  | 10.23  | 13.53  | 17.50  | 22.46 | 3.658     |
| 300.65 | 0.7926 | 1.196  | 1.797  | 2.702  | 3.974  | 5.695  | 7.876  | 10.67  | 14.11  | 18.11  | 23.20 | 3.898     |
| 303.15 | 0.8599 | 1.289  | 1.925  | 2.867  | 4.186  | 6.005  | 8.299  | 11.14  | 14.65  | 18.72  | 23.82 | 4.151     |
| 305.65 | 0.9328 | 1.388  | 2.070  | 3.056  | 4.471  | 6.321  | 8.706  | 11.65  | 15.17  | 19.39  | 24.54 | 4.418     |
| 308.15 | 1.009  | 1.492  | 2.216  | 3.268  | 4.758  | 6.678  | 9.150  | 12.20  | 15.83  | 20.17  | 25.34 | 4.7       |
| 310.65 | 1.090  | 1.611  | 2.367  | 3.483  | 5.034  | 7.046  | 9.655  | 12.68  | 16.38  | 20.77  | 26.04 | 4.998     |
| 313.15 | 1.186  | 1.723  | 2.526  | 3.727  | 5.338  | 7.395  | 9.991  | 13.26  | 16.98  | 21.37  | 26.73 | 5.312     |

<sup>a</sup> Standard uncertainties  $u$  are  $u(T) = 0.02$  K,  $u(p) = 0.45$  kPa; Relative standard uncertainty  $u_r$  is  $u_r(x) = 0.026$ .

Solvent mixtures were prepared by mixing different masses of the solvents with relative standard uncertainty  $u_r(w) = 0.0002$ .  $w$  represents the mass fraction of DMF in mixed solvents of DMF + ethanol.

**Table S3** Experimental mole fraction solubility ( $x_{T,w}^e \cdot 10^2$ ) of hymecromone in mixed solvent of DMF ( $w$ ) +  $n$ -propanol ( $1-w$ ) with various mass fractions within the temperature range from  $T/K = (278.15$  to  $313.15)$  under  $p=101.1$  kPa.<sup>a</sup>

| $T/K$  | $w$    |        |        |        |        |        |        |        |        |        |       | $x^{idl}$ |
|--------|--------|--------|--------|--------|--------|--------|--------|--------|--------|--------|-------|-----------|
|        | 0      | 0.0999 | 0.1997 | 0.2995 | 0.3993 | 0.5001 | 0.6008 | 0.6999 | 0.7990 | 0.8995 | 1     |           |
| 278.15 | 0.3847 | 0.8102 | 1.426  | 2.227  | 3.272  | 4.695  | 6.623  | 9.301  | 12.56  | 15.82  | 17.55 | 2.159     |
| 280.65 | 0.4202 | 0.8761 | 1.531  | 2.376  | 3.472  | 4.955  | 6.953  | 9.714  | 13.05  | 16.37  | 18.11 | 2.311     |
| 283.15 | 0.457  | 0.9454 | 1.641  | 2.533  | 3.683  | 5.229  | 7.303  | 10.16  | 13.59  | 16.98  | 18.73 | 2.472     |
| 285.65 | 0.5007 | 1.027  | 1.768  | 2.709  | 3.913  | 5.522  | 7.666  | 10.59  | 14.09  | 17.52  | 19.25 | 2.642     |
| 288.15 | 0.5509 | 1.118  | 1.909  | 2.905  | 4.168  | 5.842  | 8.059  | 11.07  | 14.63  | 18.09  | 19.79 | 2.823     |
| 290.65 | 0.5965 | 1.202  | 2.040  | 3.087  | 4.408  | 6.151  | 8.447  | 11.55  | 15.21  | 18.74  | 20.45 | 3.015     |
| 293.15 | 0.6516 | 1.301  | 2.192  | 3.298  | 4.682  | 6.496  | 8.873  | 12.06  | 15.81  | 19.39  | 21.08 | 3.217     |
| 295.65 | 0.7092 | 1.404  | 2.348  | 3.512  | 4.960  | 6.847  | 9.306  | 12.59  | 16.42  | 20.06  | 21.74 | 3.432     |
| 298.15 | 0.7704 | 1.513  | 2.514  | 3.740  | 5.254  | 7.218  | 9.764  | 13.15  | 17.07  | 20.78  | 22.46 | 3.658     |
| 300.65 | 0.8376 | 1.633  | 2.696  | 3.988  | 5.574  | 7.618  | 10.26  | 13.74  | 17.76  | 21.53  | 23.20 | 3.898     |
| 303.15 | 0.9089 | 1.757  | 2.881  | 4.235  | 5.887  | 8.004  | 10.72  | 14.29  | 18.38  | 22.18  | 23.82 | 4.151     |
| 305.65 | 0.9895 | 1.898  | 3.090  | 4.516  | 6.242  | 8.440  | 11.24  | 14.91  | 19.09  | 22.93  | 24.54 | 4.418     |
| 308.15 | 1.075  | 2.045  | 3.308  | 4.808  | 6.612  | 8.897  | 11.80  | 15.57  | 19.84  | 23.74  | 25.34 | 4.700     |
| 310.65 | 1.157  | 2.185  | 3.514  | 5.081  | 6.956  | 9.318  | 12.30  | 16.17  | 20.52  | 24.47  | 26.04 | 4.998     |
| 313.15 | 1.255  | 2.351  | 3.755  | 5.397  | 7.348  | 9.790  | 12.86  | 16.81  | 21.23  | 25.20  | 26.73 | 5.312     |

<sup>a</sup> Standard uncertainties  $u$  are  $u(T) = 0.02$  K,  $u(p) = 0.45$  kPa; Relative standard uncertainty  $u_r$  is  $u_r(x) = 0.026$ .

Solvent mixtures were prepared by mixing different masses of the solvents with relative standard uncertainty  $u_r(w) = 0.0002$ .  $w$  represents the mass fraction of DMF in mixed solvents of DMF +  $n$ -propanol.

**Table S4** Values of parameters obtained using solubility models.

| Jouyban–Acree           |         | van't     | Hoff–   | Apelblat– Jouyban–Acree |         |
|-------------------------|---------|-----------|---------|-------------------------|---------|
| parameter               | value   | parameter | value   | parameter               | value   |
| <i>DMF + methanol</i>   |         |           |         |                         |         |
| $J_0$                   | 825.55  | $A_1$     | 2.067   | $A_1$                   | -29.85  |
| $J_1$                   | 775.63  | $B_1$     | -1061.0 | $B_1$                   | 351.80  |
| $J_2$                   | 576.2   | $A_2$     | 6.953   | $C_1$                   | 4.770   |
|                         |         | $B_2$     | -3591.8 | $A_2$                   | 70.48   |
|                         |         | $J_0$     | 824.46  | $B_2$                   | -6425.9 |
|                         |         | $J_1$     | 772.97  | $C_2$                   | -9.48   |
|                         |         | $J_2$     | 573.49  | $J_0$                   | 822.6   |
|                         |         |           |         | $J_1$                   | 774.0   |
|                         |         |           |         | $J_2$                   | 568.85  |
| $RAD \cdot 10^2$        | 0.09    |           | 0.38    |                         | 0.21    |
| $RMSD \cdot 10^4$       | 0.15    |           | 3.07    |                         | 2.25    |
| <i>DMF + ethanol</i>    |         |           |         |                         |         |
| $J_0$                   | 343.13  | $A_1$     | 2.067   | $A_1$                   | -29.85  |
| $J_1$                   | -49.57  | $B_1$     | -1061.0 | $B_1$                   | 351.80  |
| $J_2$                   | -107.21 | $A_2$     | 4.925   | $C_1$                   | 4.770   |
|                         |         | $B_2$     | -2933.5 | $A_2$                   | -63.24  |
|                         |         | $J_0$     | 344.05  | $B_2$                   | 101.10  |
|                         |         | $J_1$     | -48.56  | $C_2$                   | 10.18   |
|                         |         | $J_2$     | -104.91 | $J_0$                   | 330.94  |
|                         |         |           |         | $J_1$                   | -68.08  |
|                         |         |           |         | $J_2$                   | -137.68 |
| $RAD \cdot 10^2$        | 0.21    |           | 0.51    |                         | 0.43    |
| $RMSD \cdot 10^4$       | 2.00    |           | 4.21    |                         | 2.94    |
| <i>DMF + n-propanol</i> |         |           |         |                         |         |
| $J_0$                   | 657.28  | $A_1$     | 2.067   | $A_1$                   | -29.85  |
| $J_1$                   | 165.53  | $B_1$     | -1061.0 | $B_1$                   | 351.80  |
| $J_2$                   | 510.50  | $A_2$     | 5.123   | $C_1$                   | 4.770   |
|                         |         | $B_2$     | -2976.6 | $A_2$                   | -44.72  |
|                         |         | $J_0$     | 657.83  | $B_2$                   | -757.50 |
|                         |         | $J_1$     | 165.32  | $C_2$                   | 7.440   |
|                         |         | $J_2$     | 516.8   | $J_0$                   | 659.05  |
|                         |         |           |         | $J_1$                   | 171.95  |
|                         |         |           |         | $J_2$                   | 519.80  |
| $RAD \cdot 10^2$        | 0.13    |           | 0.40    |                         | 0.23    |
| $RMSD \cdot 10^4$       | 1.77    |           | 4.42    |                         | 2.81    |

**Table S5** Standard enthalpy change of hymecromone in mixed solvents of DMF ( $w$ ) + methanol ( $1-w$ ), DMF ( $w$ ) + ethanol ( $1-w$ ) and DMF ( $w$ ) +  $n$ -propanol ( $1-w$ ).

| DMF ( $w$ ) + methanol ( $1-w$ ) |                                                           | DMF ( $w$ ) + ethanol ( $1-w$ ) |                                                           | DMF ( $w$ ) + $n$ -propanol ( $1-w$ ) |                                                           |
|----------------------------------|-----------------------------------------------------------|---------------------------------|-----------------------------------------------------------|---------------------------------------|-----------------------------------------------------------|
| $w$                              | $\Delta H_{\text{sol}}^{\circ}$<br>kJ · mol <sup>-1</sup> | $w$                             | $\Delta H_{\text{sol}}^{\circ}$<br>kJ · mol <sup>-1</sup> | $w$                                   | $\Delta H_{\text{sol}}^{\circ}$<br>kJ · mol <sup>-1</sup> |
| 0                                | 30.24                                                     | 0                               | 24.13                                                     | 0                                     | 24.54                                                     |
| 0.0999                           | 26.73                                                     | 0.0999                          | 22.34                                                     | 0.0999                                | 22.13                                                     |
| 0.1997                           | 23.95                                                     | 0.1999                          | 20.64                                                     | 0.1997                                | 20.11                                                     |
| 0.2996                           | 21.59                                                     | 0.3001                          | 18.94                                                     | 0.2995                                | 18.40                                                     |
| 0.3995                           | 19.54                                                     | 0.4002                          | 17.28                                                     | 0.3993                                | 16.82                                                     |
| 0.4968                           | 17.73                                                     | 0.4999                          | 15.63                                                     | 0.5001                                | 15.28                                                     |
| 0.5940                           | 15.97                                                     | 0.5997                          | 14.22                                                     | 0.6008                                | 13.81                                                     |
| 0.6969                           | 14.14                                                     | 0.6998                          | 12.70                                                     | 0.6999                                | 12.32                                                     |
| 0.7998                           | 12.31                                                     | 0.8000                          | 11.36                                                     | 0.7990                                | 10.94                                                     |
| 0.8999                           | 10.49                                                     | 0.9000                          | 10.05                                                     | 0.8995                                | 9.709                                                     |
| 1                                | 8.774                                                     | 1                               | 8.774                                                     | 1                                     | 8.774                                                     |

**Table S6** Activity coefficients ( $\gamma_3$ ) of hymecromone in DMF (1) + methanol (2) mixtures at several temperatures.

| <i>T/K</i> | <i>w</i> |        |        |        |        |        |        |        |        |        |       |
|------------|----------|--------|--------|--------|--------|--------|--------|--------|--------|--------|-------|
|            | 0        | 0.0999 | 0.1997 | 0.2996 | 0.3995 | 0.4968 | 0.5940 | 0.6969 | 0.7998 | 0.8999 | 1     |
| 278.15     | 8.591    | 3.121  | 1.550  | 0.939  | 0.649  | 0.485  | 0.369  | 0.278  | 0.207  | 0.156  | 0.123 |
| 280.65     | 8.188    | 3.015  | 1.514  | 0.926  | 0.645  | 0.486  | 0.372  | 0.282  | 0.212  | 0.161  | 0.128 |
| 283.15     | 7.726    | 2.886  | 1.467  | 0.905  | 0.636  | 0.483  | 0.373  | 0.285  | 0.216  | 0.165  | 0.132 |
| 285.65     | 7.285    | 2.763  | 1.421  | 0.887  | 0.629  | 0.481  | 0.375  | 0.289  | 0.221  | 0.170  | 0.137 |
| 288.15     | 6.967    | 2.676  | 1.391  | 0.876  | 0.627  | 0.483  | 0.379  | 0.294  | 0.226  | 0.176  | 0.143 |
| 290.65     | 6.674    | 2.597  | 1.363  | 0.866  | 0.623  | 0.484  | 0.382  | 0.298  | 0.231  | 0.181  | 0.147 |
| 293.15     | 6.404    | 2.523  | 1.337  | 0.856  | 0.621  | 0.485  | 0.385  | 0.303  | 0.236  | 0.186  | 0.153 |
| 295.65     | 6.155    | 2.455  | 1.314  | 0.848  | 0.619  | 0.487  | 0.389  | 0.307  | 0.241  | 0.191  | 0.158 |
| 298.15     | 5.929    | 2.391  | 1.292  | 0.840  | 0.618  | 0.488  | 0.392  | 0.312  | 0.246  | 0.196  | 0.163 |
| 300.65     | 5.728    | 2.335  | 1.273  | 0.834  | 0.617  | 0.490  | 0.396  | 0.317  | 0.251  | 0.201  | 0.168 |
| 303.15     | 5.517    | 2.277  | 1.253  | 0.827  | 0.616  | 0.493  | 0.400  | 0.322  | 0.258  | 0.208  | 0.174 |
| 305.65     | 5.357    | 2.235  | 1.239  | 0.824  | 0.618  | 0.496  | 0.405  | 0.328  | 0.263  | 0.213  | 0.180 |
| 308.15     | 5.194    | 2.189  | 1.224  | 0.819  | 0.618  | 0.499  | 0.409  | 0.333  | 0.269  | 0.219  | 0.185 |
| 310.65     | 5.048    | 2.151  | 1.212  | 0.817  | 0.620  | 0.503  | 0.415  | 0.339  | 0.275  | 0.225  | 0.192 |
| 313.15     | 4.864    | 2.095  | 1.192  | 0.810  | 0.619  | 0.505  | 0.419  | 0.345  | 0.282  | 0.232  | 0.199 |

**Table S7** Activity coefficients ( $\gamma_3$ ) of hymecromone in DMF (1) + ethanol (2 ) mixtures at several temperatures.

| <i>T/K</i> | <i>w</i> |        |        |        |        |        |        |        |        |        |       |
|------------|----------|--------|--------|--------|--------|--------|--------|--------|--------|--------|-------|
|            | 0        | 0.0999 | 0.1999 | 0.3001 | 0.4002 | 0.4999 | 0.5997 | 0.6998 | 0.8000 | 0.9000 | 1     |
| 278.15     | 5.852    | 3.668  | 2.301  | 1.454  | 0.930  | 0.620  | 0.427  | 0.302  | 0.220  | 0.164  | 0.123 |
| 280.65     | 5.745    | 3.612  | 2.295  | 1.451  | 0.937  | 0.629  | 0.435  | 0.307  | 0.225  | 0.169  | 0.128 |
| 283.15     | 5.617    | 3.586  | 2.286  | 1.453  | 0.947  | 0.634  | 0.439  | 0.314  | 0.231  | 0.173  | 0.132 |
| 285.65     | 5.520    | 3.542  | 2.262  | 1.456  | 0.956  | 0.643  | 0.450  | 0.323  | 0.238  | 0.180  | 0.137 |
| 288.15     | 5.416    | 3.485  | 2.248  | 1.451  | 0.961  | 0.652  | 0.457  | 0.329  | 0.245  | 0.185  | 0.143 |
| 290.65     | 5.309    | 3.437  | 2.238  | 1.453  | 0.963  | 0.657  | 0.465  | 0.335  | 0.250  | 0.191  | 0.147 |
| 293.15     | 5.203    | 3.402  | 2.208  | 1.442  | 0.970  | 0.662  | 0.471  | 0.342  | 0.257  | 0.197  | 0.153 |
| 295.65     | 5.094    | 3.348  | 2.200  | 1.452  | 0.976  | 0.674  | 0.478  | 0.350  | 0.263  | 0.203  | 0.158 |
| 298.15     | 5.018    | 3.302  | 2.180  | 1.449  | 0.981  | 0.679  | 0.485  | 0.358  | 0.270  | 0.209  | 0.163 |
| 300.65     | 4.918    | 3.259  | 2.169  | 1.443  | 0.981  | 0.684  | 0.495  | 0.365  | 0.276  | 0.215  | 0.168 |
| 303.15     | 4.827    | 3.220  | 2.156  | 1.448  | 0.992  | 0.691  | 0.500  | 0.373  | 0.283  | 0.222  | 0.174 |
| 305.65     | 4.736    | 3.183  | 2.134  | 1.446  | 0.988  | 0.699  | 0.507  | 0.379  | 0.291  | 0.228  | 0.180 |
| 308.15     | 4.658    | 3.150  | 2.121  | 1.438  | 0.988  | 0.704  | 0.514  | 0.385  | 0.297  | 0.233  | 0.185 |
| 310.65     | 4.585    | 3.102  | 2.111  | 1.435  | 0.993  | 0.709  | 0.518  | 0.394  | 0.305  | 0.241  | 0.192 |
| 313.15     | 4.479    | 3.083  | 2.103  | 1.425  | 0.995  | 0.718  | 0.532  | 0.401  | 0.313  | 0.249  | 0.199 |

**Table S8** Activity coefficients ( $\gamma_3$ ) of hymecromone in DMF (1) + *n*-propanol (2 ) mixtures at several temperatures.

| <i>T</i> /K | <i>w</i> |        |        |        |        |        |        |        |        |        |       |
|-------------|----------|--------|--------|--------|--------|--------|--------|--------|--------|--------|-------|
|             | 0        | 0.0999 | 0.1997 | 0.2995 | 0.3993 | 0.5001 | 0.6008 | 0.6999 | 0.7990 | 0.8995 | 1     |
| 278.15      | 5.612    | 2.665  | 1.514  | 0.969  | 0.660  | 0.460  | 0.326  | 0.232  | 0.172  | 0.136  | 0.123 |
| 280.65      | 5.499    | 2.637  | 1.509  | 0.973  | 0.666  | 0.466  | 0.332  | 0.238  | 0.177  | 0.141  | 0.128 |
| 283.15      | 5.409    | 2.614  | 1.506  | 0.976  | 0.671  | 0.473  | 0.338  | 0.243  | 0.182  | 0.146  | 0.132 |
| 285.65      | 5.277    | 2.573  | 1.495  | 0.975  | 0.675  | 0.479  | 0.345  | 0.250  | 0.188  | 0.151  | 0.137 |
| 288.15      | 5.125    | 2.525  | 1.479  | 0.972  | 0.677  | 0.483  | 0.350  | 0.255  | 0.193  | 0.156  | 0.143 |
| 290.65      | 5.054    | 2.508  | 1.478  | 0.977  | 0.684  | 0.490  | 0.357  | 0.261  | 0.198  | 0.161  | 0.147 |
| 293.15      | 4.937    | 2.473  | 1.468  | 0.976  | 0.687  | 0.495  | 0.363  | 0.267  | 0.203  | 0.166  | 0.153 |
| 295.65      | 4.839    | 2.444  | 1.461  | 0.977  | 0.692  | 0.501  | 0.369  | 0.273  | 0.209  | 0.171  | 0.158 |
| 298.15      | 4.749    | 2.418  | 1.455  | 0.978  | 0.696  | 0.507  | 0.375  | 0.278  | 0.214  | 0.176  | 0.163 |
| 300.65      | 4.654    | 2.387  | 1.446  | 0.977  | 0.699  | 0.512  | 0.380  | 0.284  | 0.219  | 0.181  | 0.168 |
| 303.15      | 4.567    | 2.362  | 1.441  | 0.980  | 0.705  | 0.519  | 0.387  | 0.290  | 0.226  | 0.187  | 0.174 |
| 305.65      | 4.465    | 2.328  | 1.43   | 0.978  | 0.708  | 0.523  | 0.393  | 0.296  | 0.231  | 0.193  | 0.180 |
| 308.15      | 4.372    | 2.298  | 1.421  | 0.978  | 0.711  | 0.528  | 0.398  | 0.302  | 0.237  | 0.198  | 0.185 |
| 310.65      | 4.320    | 2.287  | 1.422  | 0.984  | 0.718  | 0.536  | 0.406  | 0.309  | 0.244  | 0.204  | 0.192 |
| 313.15      | 4.232    | 2.259  | 1.415  | 0.984  | 0.723  | 0.543  | 0.413  | 0.316  | 0.250  | 0.211  | 0.199 |

**Table S9** Gibbs energy of transfer ( $\text{kJ}\cdot\text{mol}^{-1}$ ) of hymecromone (3) from neat methanol (2) or ethanol (2) to DMF (1) + methanol (2) and DMF (1) + ethanol (2) mixtures at several temperatures.

| DMF (1) + methanol (2) |          |          |          |          |          | DMF (1) + ethanol (2) |          |          |          |          |          |
|------------------------|----------|----------|----------|----------|----------|-----------------------|----------|----------|----------|----------|----------|
| $x_1^a$                | 293.15 K | 298.15 K | 303.15 K | 308.15 K | 313.15 K | $x_1^a$               | 293.15 K | 298.15 K | 303.15 K | 308.15 K | 313.15 K |
| 0                      | 0        | 0        | 0        | 0        | 0        | 0                     | 0        | 0        | 0        | 0        | 0        |
| 0.04640                | -2.272   | -2.213   | -2.232   | -2.213   | -2.193   | 0.06538               | -1.038   | -1.038   | -1.020   | -1.002   | -0.972   |
| 0.09860                | -3.819   | -3.714   | -3.738   | -3.703   | -3.661   | 0.1361                | -2.090   | -2.067   | -2.031   | -2.016   | -1.968   |
| 0.1579                 | -4.906   | -4.763   | -4.784   | -4.731   | -4.666   | 0.2128                | -3.129   | -3.079   | -3.035   | -3.011   | -2.981   |
| 0.2258                 | -5.688   | -5.512   | -5.525   | -5.454   | -5.368   | 0.2961                | -4.095   | -4.047   | -3.989   | -3.973   | -3.916   |
| 0.3021                 | -6.290   | -6.085   | -6.089   | -6.002   | -5.895   | 0.3865                | -5.025   | -4.958   | -4.898   | -4.842   | -4.765   |
| 0.3907                 | -6.853   | -6.620   | -6.613   | -6.508   | -6.382   | 0.4857                | -5.854   | -5.791   | -5.714   | -5.649   | -5.548   |
| 0.5020                 | -7.441   | -7.178   | -7.160   | -7.039   | -6.890   | 0.5950                | -6.637   | -6.548   | -6.456   | -6.386   | -6.285   |
| 0.6365                 | -8.045   | -7.753   | -7.725   | -7.586   | -7.418   | 0.7160                | -7.329   | -7.241   | -7.146   | -7.053   | -6.929   |
| 0.7976                 | -8.629   | -8.308   | -8.269   | -8.114   | -7.923   | 0.8501                | -7.979   | -7.878   | -7.764   | -7.674   | -7.528   |
| 1                      | -9.109   | -8.761   | -8.709   | -8.537   | -8.326   | 1                     | -8.602   | -8.497   | -8.371   | -8.258   | -8.111   |

<sup>a</sup>  $x_1$  is the mole fraction of DMF (1) in the DMF (1) + methanol (ethanol) (2) mixtures free of hymecromone (3).



**Table S10** Gibbs energy of transfer ( $\text{kJ}\cdot\text{mol}^{-1}$ ) of hymecromone (3) from neat *n*-propanol (2) to DMF (1) + *n*-propanol (2) mixtures at several temperatures.

| ethyl acetate (1) + <i>n</i> -propanol (2) |          |          |          |          |          |
|--------------------------------------------|----------|----------|----------|----------|----------|
| $x_1^a$                                    | 293.15 K | 298.15 K | 303.15 K | 308.15 K | 313.15 K |
| 0                                          | 0        | 0        | 0        | 0        | 0        |
| 0.08358                                    | -1.684   | -1.674   | -1.661   | -1.648   | -1.634   |
| 0.1702                                     | -2.955   | -2.933   | -2.907   | -2.880   | -2.853   |
| 0.2600                                     | -3.951   | -3.918   | -3.878   | -3.838   | -3.798   |
| 0.3533                                     | -4.805   | -4.760   | -4.708   | -4.654   | -4.601   |
| 0.4512                                     | -5.603   | -5.547   | -5.483   | -5.414   | -5.348   |
| 0.5529                                     | -6.363   | -6.296   | -6.219   | -6.138   | -6.058   |
| 0.6571                                     | -7.111   | -7.034   | -6.944   | -6.848   | -6.756   |
| 0.7656                                     | -7.771   | -7.681   | -7.578   | -7.469   | -7.364   |
| 0.8803                                     | -8.268   | -8.169   | -8.052   | -7.929   | -7.810   |
| 1                                          | -8.472   | -8.361   | -8.231   | -8.096   | -7.963   |

<sup>a</sup>  $x_1$  is the mole fraction of DMF (1) in the DMF (1) + *n*-propanol (2) mixtures free of hymecromone (3).

**Table S11** Coefficients of Eqs. (36) and (37) ( $\text{kJ}\cdot\text{mol}^{-1}$ ) applied to Gibbs energy of transfer of hymecromone (3) from neat methanol (ethanol and *n*-propanol) (2) to DMF(1) + methanol (2), DMF (1) + ethanol (2) and DMF (1) + *n*-propanol mixtures at several temperatures.

| Coeffi<br>cient | DMF (1) + methanol (2) |             |             |          |          | DMF (1) + ethanol (2) |             |             |             |             |
|-----------------|------------------------|-------------|-------------|----------|----------|-----------------------|-------------|-------------|-------------|-------------|
|                 | 293.15<br>K            | 298.15<br>K | 303.15<br>K | 308.15 K | 313.15 K | 293.15<br>K           | 298.15<br>K | 303.15<br>K | 308.15<br>K | 313.15<br>K |
| $A_0$           | -10.795                | -10.364     | -10.273     | -10.056  | -9.7766  | -10.623               | -10.501     | -10.332     | -10.141     | -9.9158     |
| $A_1$           | 3.9983                 | 6.4564      | 6.3186      | 3.9485   | 3.9249   | 5.3243                | 5.2607      | 5.1788      | 5.0848      | 4.9760      |
| $t_1$           | 0.07394                | 0.70913     | 0.70722     | 0.07343  | 0.0731   | 0.60614               | 0.60746     | 0.60473     | 0.59683     | 0.59072     |
| $A_2$           | 6.8031                 | 3.9141      | 3.9610      | 6.1146   | 5.8584   | 5.3243                | 5.2607      | 5.1788      | 5.0848      | 4.9760      |
| $t_2$           | 0.70851                | 0.0738      | 0.07352     | 0.70876  | 0.70667  | 0.60614               | 0.60746     | 0.60473     | 0.59683     | 0.59072     |

  

| Coefficient | DMF (1) + <i>n</i> -propanol (2) |                       |                       |                       |                       |
|-------------|----------------------------------|-----------------------|-----------------------|-----------------------|-----------------------|
|             | 293.15 K                         | 298.15 K              | 303.15 K              | 308.15 K              | 313.15 K              |
| $a$         | $3.005\times 10^{-4}$            | $1.745\times 10^{-4}$ | $1.148\times 10^{-4}$ | $1.339\times 10^{-4}$ | $2.093\times 10^{-4}$ |
| $b$         | -23.725                          | -23.605               | -23.448               | -23.295               | -23.124               |
| $c$         | 48.326                           | 48.408                | 48.437                | 48.4862               | 48.386                |
| $d$         | -72.766                          | -73.029               | -73.290               | -73.503               | -73.346               |
| $e$         | 53.165                           | 53.429                | 53.799                | 54.052                | 53.891                |
| $f$         | -13.472                          | -13.565               | -13.728               | -13.835               | -13.770               |

**Table S12**  $D$  values ( $\text{kJ}\cdot\text{mol}^{-1}$ ) of hymecromone (3) from neat methanol (2) or ethanol (2) to DMF (1) + methanol (2) and DMF (1) + ethanol (2) mixtures at several temperatures.

| $x_1^a$ | DMF (1) + methanol (2) |        |        |        |        | DMF (1) + ethanol (2) |        |        |        |        |
|---------|------------------------|--------|--------|--------|--------|-----------------------|--------|--------|--------|--------|
|         | 293.15                 | 298.15 | 303.15 | 308.15 | 313.15 | 293.15                | 298.15 | 303.15 | 308.15 | 313.15 |
|         | K                      | K      | K      | K      | K      | K                     | K      | K      | K      | K      |
| 0       | -63.68                 | -62.14 | -62.81 | -62.40 | -61.98 | -17.57                | -17.32 | -17.13 | -17.13 | -16.85 |
| 0.05    | -36.45                 | -35.42 | -35.62 | -35.26 | -34.82 | -16.18                | -15.95 | -15.77 | -15.77 | -15.48 |
| 0.10    | -22.32                 | -21.59 | -21.58 | -21.27 | -20.87 | -14.90                | -14.69 | -14.52 | -14.52 | -14.22 |
| 0.15    | -14.88                 | -14.32 | -14.23 | -13.95 | -13.60 | -13.72                | -13.53 | -13.37 | -13.37 | -13.07 |
| 0.20    | -10.86                 | -10.40 | -10.28 | -10.04 | -9.728 | -12.63                | -12.46 | -12.31 | -12.31 | -12.01 |
| 0.25    | -8.586                 | -8.192 | -8.071 | -7.849 | -7.576 | -11.63                | -11.48 | -11.33 | -11.33 | -11.03 |
| 0.30    | -7.223                 | -6.874 | -6.756 | -6.554 | -6.309 | -10.71                | -10.57 | -10.43 | -10.43 | -10.14 |
| 0.35    | -6.335                 | -6.020 | -5.908 | -5.723 | -5.499 | -9.862                | -9.735 | -9.602 | -9.602 | -9.316 |
| 0.40    | -5.702                 | -5.414 | -5.309 | -5.138 | -4.933 | -9.081                | -8.966 | -8.840 | -8.840 | -8.560 |
| 0.45    | -5.211                 | -4.946 | -4.847 | -4.689 | -4.499 | -8.362                | -8.257 | -8.138 | -8.138 | -7.865 |
| 0.50    | -4.804                 | -4.559 | -4.466 | -4.320 | -4.143 | -7.700                | -7.605 | -7.492 | -7.492 | -7.227 |
| 0.55    | -4.450                 | -4.223 | -4.135 | -4.001 | -3.836 | -7.090                | -7.004 | -6.898 | -6.898 | -6.640 |
| 0.60    | -4.133                 | -3.922 | -3.840 | -3.715 | -3.561 | -6.529                | -6.451 | -6.350 | -6.350 | -6.101 |
| 0.65    | -3.845                 | -3.649 | -3.572 | -3.456 | -3.312 | -6.012                | -5.941 | -5.846 | -5.846 | -5.606 |
| 0.70    | -3.579                 | -3.397 | -3.324 | -3.217 | -3.082 | -5.536                | -5.471 | -5.382 | -5.382 | -5.151 |
| 0.75    | -3.334                 | -3.164 | -3.096 | -2.996 | -2.870 | -5.097                | -5.039 | -4.955 | -4.955 | -4.733 |
| 0.80    | -3.106                 | -2.948 | -2.884 | -2.791 | -2.673 | -4.694                | -4.641 | -4.562 | -4.562 | -4.349 |
| 0.85    | -2.893                 | -2.747 | -2.686 | -2.601 | -2.490 | -4.322                | -4.274 | -4.200 | -4.200 | -3.996 |
| 0.90    | -2.696                 | -2.559 | -2.503 | -2.423 | -2.320 | -3.980                | -3.937 | -3.867 | -3.867 | -3.672 |
| 0.95    | -2.512                 | -2.385 | -2.332 | -2.258 | -2.161 | -3.665                | -3.625 | -3.560 | -3.560 | -3.374 |
| 1       | -2.341                 | -2.223 | -2.173 | -2.104 | -2.014 | -3.375                | -3.339 | -3.277 | -3.277 | -3.100 |

<sup>a</sup>  $x_1$  is the mole fraction of DMF (1) in the DMF (1) + methanol (ethanol) (2) mixtures free of hymecromone (3).

**Table S13**  $D$  values ( $\text{kJ}\cdot\text{mol}^{-1}$ ) of hymecromone (3) from neat  $n$ -propanol (2) to DMF (1) +  $n$ -propanol (2) mixtures at several temperatures.

| $x_1^a$ | DMF (1) + $n$ -propanol (2) |                       |          |          |          |
|---------|-----------------------------|-----------------------|----------|----------|----------|
|         | 293.15 K                    | 298.15 K              | 303.15 K | 308.15 K | 313.15 K |
| 0       | -23.72                      | -23.61                | -23.45   | -23.29   | -23.13   |
| 0.05    | -19.41                      | -19.29                | -19.13   | -18.97   | -18.81   |
| 0.10    | -16.04                      | -15.91                | -15.75   | -15.59   | -15.44   |
| 0.15    | -13.45                      | -13.32                | -13.17   | -13.02   | -12.87   |
| 0.20    | -11.53                      | -11.40                | -11.26   | -11.10   | -10.96   |
| 0.25    | -10.15                      | -10.02                | -9.878   | -9.729   | -9.584   |
| 0.30    | -9.180                      | -9.057                | -8.920   | -8.775   | -8.633   |
| 0.35    | -8.531                      | -8.414                | -8.279   | -8.138   | -7.999   |
| 0.40    | -8.106                      | -7.993                | -7.862   | -7.723   | -7.587   |
| 0.45    | -7.820                      | -7.711                | -7.582   | -7.447   | -7.314   |
| 0.50    | -7.600                      | -7.495                | -7.368   | -7.234   | -7.104   |
| 0.55    | -7.384                      | -7.280                | -7.155   | -7.023   | -6.895   |
| 0.60    | -7.116                      | -7.013                | -6.890   | -6.759   | -6.634   |
| 0.65    | -6.755                      | -6.651                | -6.529   | -6.400   | -6.277   |
| 0.70    | -6.266                      | -6.162                | -6.041   | -5.914   | -5.792   |
| 0.75    | -5.627                      | -5.522                | -5.403   | -5.277   | -5.158   |
| 0.80    | -4.824                      | -4.720                | -4.602   | -4.479   | -4.362   |
| 0.85    | -3.854                      | -3.753                | -3.638   | -3.519   | -3.403   |
| 0.90    | -2.725                      | -2.630                | -2.517   | -2.405   | -2.290   |
| 0.95    | -1.453                      | -1.369                | -1.260   | -1.156   | -1.042   |
| 1       | -0.066                      | $7.635\times 10^{-4}$ | 0.1040   | 0.1980   | 0.3110   |

<sup>a</sup>  $x_1$  is the mole fraction of DMF (1) in the DMF (1) +  $n$ -propanol (2) mixtures free of hymecromone (3).

**Table S14**  $G_{1,3}$  and  $G_{2,3}$  values ( $\text{cm}^3\cdot\text{mol}^{-1}$ ) for hymecromone (3) in DMF (1) + methanol (2) mixtures at several temperatures.

| $x_1^a$ | $G_{1,3}$   |             |             |             |             | $G_{2,3}$   |             |             |             |             |
|---------|-------------|-------------|-------------|-------------|-------------|-------------|-------------|-------------|-------------|-------------|
|         | 293.15<br>K | 298.15<br>K | 303.15<br>K | 308.15<br>K | 313.15<br>K | 293.15<br>K | 298.15<br>K | 303.15<br>K | 308.15<br>K | 313.15<br>K |
| 0       | -1188       | -1145       | -1151       | -1134       | -1117       | -130.5      | -130.5      | -130.4      | -130.4      | -130.3      |
| 0.05    | -683.7      | -659.0      | -659.4      | -648.5      | -636.9      | -184.6      | -182.1      | -182.0      | -180.9      | -179.6      |
| 0.10    | -440.5      | -425.2      | -423.7      | -416.3      | -408.1      | -194.8      | -191.6      | -191.1      | -189.5      | -187.7      |
| 0.15    | -319.7      | -309.4      | -307.5      | -302.2      | -296.1      | -193.2      | -189.7      | -188.9      | -187.1      | -185.0      |
| 0.20    | -257.0      | -249.5      | -247.6      | -243.5      | -238.9      | -190.1      | -186.6      | -185.6      | -183.6      | -181.3      |
| 0.25    | -222.1      | -216.4      | -214.7      | -211.5      | -207.8      | -188.3      | -184.7      | -183.5      | -181.4      | -179.1      |
| 0.30    | -201.1      | -196.5      | -195.0      | -192.4      | -189.4      | -188.0      | -184.2      | -182.9      | -180.7      | -178.3      |
| 0.35    | -187.1      | -183.4      | -182.1      | -179.9      | -177.5      | -188.5      | -184.7      | -183.3      | -181.0      | -178.5      |
| 0.40    | -177.0      | -173.9      | -172.8      | -171.0      | -169.0      | -189.6      | -185.7      | -184.2      | -181.9      | -179.2      |
| 0.45    | -169.2      | -166.6      | -165.7      | -164.2      | -162.5      | -190.9      | -186.9      | -185.3      | -182.9      | -180.2      |
| 0.50    | -162.9      | -160.7      | -160.0      | -158.7      | -157.2      | -192.2      | -188.1      | -186.5      | -184.0      | -181.2      |
| 0.55    | -157.6      | -155.8      | -155.2      | -154.1      | -152.9      | -193.4      | -189.2      | -187.6      | -185.1      | -182.2      |
| 0.60    | -153.1      | -151.6      | -151.1      | -150.2      | -149.2      | -194.6      | -190.3      | -188.6      | -186.1      | -183.2      |
| 0.65    | -149.3      | -148.0      | -147.6      | -146.8      | -146.0      | -195.6      | -191.3      | -189.6      | -187.0      | -184.0      |
| 0.70    | -145.9      | -144.9      | -144.5      | -143.9      | -143.2      | -196.6      | -192.2      | -190.5      | -187.9      | -184.9      |
| 0.75    | -142.9      | -142.1      | -141.8      | -141.3      | -140.8      | -197.7      | -193.2      | -191.5      | -188.8      | -185.8      |
| 0.80    | -140.3      | -139.7      | -139.4      | -139.1      | -138.6      | -198.8      | -194.3      | -192.5      | -189.8      | -186.7      |
| 0.85    | -137.9      | -137.5      | -137.3      | -137.0      | -136.7      | -200.1      | -195.5      | -193.7      | -191.0      | -187.8      |
| 0.90    | -135.8      | -135.5      | -135.4      | -135.2      | -135.0      | -201.7      | -197.0      | -195.1      | -192.4      | -189.1      |
| 0.95    | -133.8      | -133.7      | -133.6      | -133.5      | -133.4      | -203.6      | -198.8      | -196.8      | -194.0      | -190.7      |
| 1       | -132.0      | -131.9      | -131.9      | -131.9      | -131.9      | -206.0      | -201.0      | -199.0      | -196.1      | -192.7      |

<sup>a</sup>  $x_1$  is the mole fraction of ethyl acetate in the DMF (1) + methanol (2) mixtures.

**Table S15**  $G_{1,3}$  and  $G_{2,3}$  values ( $\text{cm}^3\cdot\text{mol}^{-1}$ ) for hymecromone (3) in DMF (1) + ethanol (2) mixtures at several temperatures.

| $x_1^a$ | $G_{1,3}$   |             |             |             |             | $G_{2,3}$   |             |             |             |             |
|---------|-------------|-------------|-------------|-------------|-------------|-------------|-------------|-------------|-------------|-------------|
|         | 293.15<br>K | 298.15<br>K | 303.15<br>K | 308.15<br>K | 313.15<br>K | 293.15<br>K | 298.15<br>K | 303.15<br>K | 308.15<br>K | 313.15<br>K |
| 0       | -551.1      | -540.4      | -531.3      | -527.0      | -516.4      | -130.8      | -130.7      | -130.7      | -130.6      | -130.6      |
| 0.05    | -503.6      | -492.6      | -483.0      | -478.1      | -467.1      | -156.5      | -155.7      | -155.0      | -154.6      | -153.8      |
| 0.10    | -456.6      | -446.1      | -436.9      | -431.8      | -421.2      | -178.3      | -176.7      | -175.3      | -174.5      | -173.0      |
| 0.15    | -412.2      | -402.7      | -394.3      | -389.6      | -379.6      | -196.0      | -193.8      | -191.8      | -190.6      | -188.3      |
| 0.20    | -371.8      | -363.6      | -356.1      | -352.0      | -342.9      | -210.0      | -207.2      | -204.7      | -203.3      | -200.3      |
| 0.25    | -335.8      | -328.9      | -322.5      | -318.9      | -310.8      | -220.7      | -217.6      | -214.7      | -213.1      | -209.5      |
| 0.30    | -304.4      | -298.7      | -293.2      | -290.2      | -283.1      | -228.7      | -225.4      | -222.3      | -220.6      | -216.5      |
| 0.35    | -277.2      | -272.5      | -267.9      | -265.5      | -259.2      | -234.6      | -231.2      | -228.0      | -226.2      | -221.7      |
| 0.40    | -253.7      | -249.9      | -246.2      | -244.2      | -238.7      | -238.8      | -235.4      | -232.0      | -230.2      | -225.4      |
| 0.45    | -233.6      | -230.5      | -227.4      | -225.8      | -221.1      | -241.6      | -238.3      | -234.9      | -233.1      | -228.0      |
| 0.50    | -216.3      | -213.8      | -211.3      | -210.0      | -206.0      | -243.5      | -240.2      | -236.8      | -235.0      | -229.7      |
| 0.55    | -201.4      | -199.5      | -197.4      | -196.4      | -193.0      | -244.5      | -241.3      | -237.9      | -236.2      | -230.7      |
| 0.60    | -188.6      | -187.1      | -185.4      | -184.6      | -181.7      | -245.0      | -241.8      | -238.4      | -236.8      | -231.1      |
| 0.65    | -177.6      | -176.3      | -175.0      | -174.3      | -172.0      | -244.9      | -241.8      | -238.5      | -236.9      | -231.1      |
| 0.70    | -168.0      | -167.0      | -166.0      | -165.5      | -163.6      | -244.5      | -241.5      | -238.1      | -236.6      | -230.7      |
| 0.75    | -159.7      | -159.0      | -158.1      | -157.8      | -156.3      | -243.7      | -240.8      | -237.4      | -236.0      | -230.0      |
| 0.80    | -152.5      | -152.0      | -151.4      | -151.1      | -149.9      | -242.8      | -239.9      | -236.5      | -235.1      | -229.0      |
| 0.85    | -146.3      | -145.9      | -145.5      | -145.3      | -144.4      | -241.7      | -238.9      | -235.5      | -234.2      | -228.0      |
| 0.90    | -140.9      | -140.6      | -140.3      | -140.2      | -139.7      | -240.5      | -237.8      | -234.5      | -233.2      | -227.0      |
| 0.95    | -136.1      | -136.0      | -135.9      | -135.8      | -135.5      | -239.5      | -236.9      | -233.7      | -232.4      | -226.0      |
| 1       | -132.0      | -131.9      | -131.9      | -131.9      | -131.9      | -238.6      | -236.2      | -233.1      | -231.9      | -225.4      |

<sup>a</sup>  $x_1$  is the mole fraction of ethyl acetate in the DMF (1) + ethanol (2) mixtures.

**Table S16**  $G_{1,3}$  and  $G_{2,3}$  values ( $\text{cm}^3\cdot\text{mol}^{-1}$ ) for hymecromone (3) in DMF (1) + *n*-propanol (2) mixtures at several temperatures.

| $x_1^a$ | $G_{1,3}$   |             |             |             |             | $G_{2,3}$   |             |             |             |             |
|---------|-------------|-------------|-------------|-------------|-------------|-------------|-------------|-------------|-------------|-------------|
|         | 293.15<br>K | 298.15<br>K | 303.15<br>K | 308.15<br>K | 313.15<br>K | 293.15<br>K | 298.15<br>K | 303.15<br>K | 308.15<br>K | 313.15<br>K |
| 0       | -858.8      | -846.8      | -833.8      | -821.0      | -808.8      | -131.1      | -131.0      | -131.0      | -130.9      | -130.9      |
| 0.05    | -708.5      | -695.0      | -681.2      | -667.8      | -655.1      | -161.9      | -161.1      | -160.3      | -159.6      | -159.0      |
| 0.10    | -586.7      | -573.6      | -560.5      | -547.9      | -536.0      | -182.5      | -181.0      | -179.5      | -178.1      | -176.8      |
| 0.15    | -491.3      | -479.4      | -467.8      | -456.5      | -446.0      | -195.8      | -193.7      | -191.6      | -189.6      | -187.7      |
| 0.20    | -418.7      | -408.3      | -398.3      | -388.6      | -379.5      | -204.5      | -201.8      | -199.3      | -196.8      | -194.5      |
| 0.25    | -364.4      | -355.6      | -347.1      | -338.8      | -331.1      | -210.7      | -207.7      | -204.8      | -202.0      | -199.4      |
| 0.30    | -324.2      | -316.8      | -309.5      | -302.5      | -296.0      | -216.0      | -212.7      | -209.5      | -206.5      | -203.6      |
| 0.35    | -294.1      | -287.9      | -281.7      | -275.8      | -270.2      | -221.3      | -217.9      | -214.4      | -211.2      | -208.1      |
| 0.40    | -270.9      | -265.7      | -260.5      | -255.4      | -250.7      | -227.0      | -223.5      | -219.9      | -216.4      | -213.1      |
| 0.45    | -252.1      | -247.8      | -243.3      | -239.0      | -235.0      | -233.2      | -229.5      | -225.8      | -222.1      | -218.7      |
| 0.50    | -236.0      | -232.4      | -228.6      | -225.0      | -221.6      | -239.4      | -235.6      | -231.8      | -228.0      | -224.4      |
| 0.55    | -221.4      | -218.4      | -215.3      | -212.2      | -209.3      | -245.1      | -241.3      | -237.3      | -233.4      | -229.7      |
| 0.60    | -207.6      | -205.1      | -202.5      | -200.0      | -197.6      | -249.7      | -245.8      | -241.8      | -237.8      | -234.0      |
| 0.65    | -194.3      | -192.3      | -190.1      | -188.0      | -186.1      | -252.3      | -248.4      | -244.3      | -240.2      | -236.4      |
| 0.70    | -181.4      | -179.7      | -178.0      | -176.4      | -174.8      | -252.1      | -248.1      | -244.0      | -239.9      | -236.1      |
| 0.75    | -169.1      | -167.8      | -166.4      | -165.1      | -163.9      | -248.2      | -244.2      | -240.1      | -236.0      | -232.1      |
| 0.80    | -157.6      | -156.7      | -155.7      | -154.7      | -153.8      | -239.5      | -235.6      | -231.5      | -227.4      | -223.6      |
| 0.85    | -147.6      | -147.0      | -146.3      | -145.6      | -144.9      | -224.9      | -221.2      | -217.2      | -213.3      | -209.6      |
| 0.90    | -139.5      | -139.1      | -138.7      | -138.3      | -137.9      | -203.4      | -200.0      | -196.2      | -192.5      | -188.9      |
| 0.95    | -134.0      | -133.9      | -133.7      | -133.5      | -133.3      | -173.6      | -170.7      | -167.2      | -163.8      | -160.3      |
| 1       | -132.0      | -131.9      | -131.9      | -131.9      | -131.9      | -134.0      | -131.9      | -128.7      | -125.8      | -122.5      |

<sup>a</sup>  $x_1$  is the mole fraction of DMF (1) in the DMF (1) + *n*-propanol (2) mixtures.

**Table S17** Correlation volume and  $\delta x_{1,3}$  values for hymecromone (3) in DMF (1) + methanol (2) mixtures at several temperatures.

| $x_1^a$ | $V_{\text{cor}} (\text{cm}^3 \cdot \text{mol}^{-1})$ |        |        |        |        | $100 \delta x_{1,3}$ |        |        |        |        |
|---------|------------------------------------------------------|--------|--------|--------|--------|----------------------|--------|--------|--------|--------|
|         | 293.15                                               | 298.15 | 303.15 | 308.15 | 313.15 | 293.15               | 298.15 | 303.15 | 308.15 | 313.15 |
|         | K                                                    | K      | K      | K      | K      | K                    | K      | K      | K      | K      |
| 0       | 1101                                                 | 1101   | 1109   | 1113   | 1117   | 0                    | 0      | 0      | 0      | 0      |
| 0.05    | 1114                                                 | 1115   | 1123   | 1128   | 1132   | -2.621               | -2.492 | -2.472 | -2.405 | -2.335 |
| 0.10    | 1144                                                 | 1145   | 1154   | 1158   | 1163   | -2.391               | -2.261 | -2.228 | -2.158 | -2.080 |
| 0.15    | 1177                                                 | 1178   | 1186   | 1191   | 1196   | -1.673               | -1.574 | -1.543 | -1.487 | -1.425 |
| 0.20    | 1209                                                 | 1210   | 1218   | 1223   | 1228   | -1.064               | -0.997 | -0.973 | -0.934 | -0.890 |
| 0.25    | 1240                                                 | 1241   | 1250   | 1254   | 1259   | -0.607               | -0.567 | -0.552 | -0.529 | -0.503 |
| 0.30    | 1271                                                 | 1271   | 1280   | 1285   | 1289   | -0.255               | -0.238 | -0.232 | -0.223 | -0.212 |
| 0.35    | 1301                                                 | 1301   | 1310   | 1315   | 1320   | 0.029                | 0.027  | 0.024  | 0.022  | 0.020  |
| 0.40    | 1331                                                 | 1331   | 1340   | 1345   | 1349   | 0.264                | 0.245  | 0.235  | 0.223  | 0.209  |
| 0.45    | 1360                                                 | 1360   | 1370   | 1374   | 1379   | 0.455                | 0.423  | 0.407  | 0.386  | 0.364  |
| 0.50    | 1390                                                 | 1389   | 1399   | 1404   | 1408   | 0.604                | 0.562  | 0.541  | 0.514  | 0.484  |
| 0.55    | 1418                                                 | 1418   | 1428   | 1433   | 1437   | 0.712                | 0.662  | 0.638  | 0.606  | 0.571  |
| 0.60    | 1447                                                 | 1447   | 1457   | 1461   | 1466   | 0.778                | 0.724  | 0.698  | 0.664  | 0.626  |
| 0.65    | 1475                                                 | 1475   | 1485   | 1490   | 1495   | 0.805                | 0.750  | 0.723  | 0.688  | 0.648  |
| 0.70    | 1503                                                 | 1503   | 1513   | 1518   | 1523   | 0.794                | 0.740  | 0.713  | 0.679  | 0.640  |
| 0.75    | 1531                                                 | 1530   | 1541   | 1546   | 1551   | 0.748                | 0.697  | 0.671  | 0.639  | 0.603  |
| 0.80    | 1558                                                 | 1557   | 1568   | 1573   | 1578   | 0.666                | 0.621  | 0.599  | 0.570  | 0.538  |
| 0.85    | 1585                                                 | 1584   | 1595   | 1601   | 1606   | 0.552                | 0.514  | 0.496  | 0.473  | 0.446  |
| 0.90    | 1611                                                 | 1611   | 1622   | 1627   | 1633   | 0.404                | 0.376  | 0.363  | 0.346  | 0.326  |
| 0.95    | 1638                                                 | 1637   | 1649   | 1654   | 1660   | 0.221                | 0.206  | 0.199  | 0.189  | 0.179  |
| 1       | 1664                                                 | 1663   | 1675   | 1680   | 1686   | 0                    | 0      | 0      | 0      | 0      |

<sup>a</sup>  $x_1$  is the mole fraction of DMF in the DMF (1) + methanol (2) mixtures.



**Table S18** Correlation volume and  $\delta x_{1,3}$  values for hymecromone (3) in DMF (1) + ethanol (2) mixtures at several temperatures.

| $x_1^a$ | $V_{\text{cor}} (\text{cm}^3 \cdot \text{mol}^{-1})$ |             |             |             |             | $100 \delta x_{1,3}$ |             |             |             |             |
|---------|------------------------------------------------------|-------------|-------------|-------------|-------------|----------------------|-------------|-------------|-------------|-------------|
|         | 293.15<br>K                                          | 298.15<br>K | 303.15<br>K | 308.15<br>K | 313.15<br>K | 293.15<br>K          | 298.15<br>K | 303.15<br>K | 308.15<br>K | 313.15<br>K |
| 0       | 1386                                                 | 1391        | 1396        | 1401        | 1406        | 0                    | 0           | 0           | 0           | 0           |
| 0.05    | 1396                                                 | 1401        | 1406        | 1411        | 1417        | -1.349               | -1.302      | -1.262      | -1.238      | -1.193      |
| 0.10    | 1408                                                 | 1413        | 1418        | 1424        | 1429        | -2.084               | -2.005      | -1.935      | -1.893      | -1.815      |
| 0.15    | 1421                                                 | 1426        | 1432        | 1437        | 1442        | -2.312               | -2.218      | -2.135      | -2.086      | -1.991      |
| 0.20    | 1435                                                 | 1440        | 1446        | 1451        | 1457        | -2.171               | -2.082      | -2.001      | -1.952      | -1.858      |
| 0.25    | 1450                                                 | 1455        | 1461        | 1466        | 1472        | -1.799               | -1.725      | -1.658      | -1.618      | -1.535      |
| 0.30    | 1465                                                 | 1470        | 1476        | 1481        | 1487        | -1.310               | -1.258      | -1.209      | -1.180      | -1.118      |
| 0.35    | 1480                                                 | 1485        | 1491        | 1496        | 1502        | -0.787               | -0.757      | -0.728      | -0.712      | -0.674      |
| 0.40    | 1495                                                 | 1500        | 1506        | 1511        | 1517        | -0.286               | -0.277      | -0.267      | -0.262      | -0.249      |
| 0.45    | 1510                                                 | 1515        | 1521        | 1526        | 1532        | 0.157                | 0.150       | 0.144       | 0.139       | 0.130       |
| 0.50    | 1525                                                 | 1530        | 1536        | 1541        | 1547        | 0.525                | 0.506       | 0.486       | 0.475       | 0.446       |
| 0.55    | 1540                                                 | 1545        | 1550        | 1556        | 1561        | 0.809                | 0.781       | 0.752       | 0.736       | 0.692       |
| 0.60    | 1554                                                 | 1559        | 1565        | 1570        | 1576        | 1.007                | 0.974       | 0.938       | 0.919       | 0.863       |
| 0.65    | 1568                                                 | 1574        | 1579        | 1584        | 1590        | 1.121                | 1.084       | 1.045       | 1.025       | 0.962       |
| 0.70    | 1582                                                 | 1588        | 1593        | 1599        | 1604        | 1.154                | 1.118       | 1.078       | 1.058       | 0.992       |
| 0.75    | 1596                                                 | 1601        | 1607        | 1612        | 1618        | 1.113                | 1.078       | 1.040       | 1.022       | 0.957       |
| 0.80    | 1610                                                 | 1615        | 1621        | 1626        | 1632        | 1.003                | 0.973       | 0.939       | 0.922       | 0.863       |
| 0.85    | 1623                                                 | 1629        | 1634        | 1640        | 1645        | 0.831                | 0.807       | 0.779       | 0.765       | 0.716       |
| 0.90    | 1637                                                 | 1642        | 1648        | 1653        | 1659        | 0.604                | 0.586       | 0.566       | 0.557       | 0.520       |
| 0.95    | 1650                                                 | 1656        | 1661        | 1667        | 1673        | 0.325                | 0.316       | 0.306       | 0.301       | 0.281       |
| 1       | 1663                                                 | 1669        | 1675        | 1680        | 1686        | 0                    | 0           | 0           | 0           | 0           |

<sup>a</sup>  $x_1$  is the mole fraction of DMF in the DMF (1) + ethanol (2) mixtures.

**Table S19** Correlation volume and  $\delta x_{1,3}$  values for hycromone (3) in DMF (1) + *n*-propanol (2) mixtures at several temperatures.

| $x_1^a$ | $V_{\text{cor}} (\text{cm}^3 \cdot \text{mol}^{-1})$ |             |             |             |             | $100 \delta x_{1,3}$ |             |             |             |             |
|---------|------------------------------------------------------|-------------|-------------|-------------|-------------|----------------------|-------------|-------------|-------------|-------------|
|         | 293.15<br>K                                          | 298.15<br>K | 303.15<br>K | 308.15<br>K | 313.15<br>K | 293.15<br>K          | 298.15<br>K | 303.15<br>K | 308.15<br>K | 313.15<br>K |
| 0       | 1631                                                 | 1636        | 1642        | 1648        | 1653        | 0                    | 0           | 0           | 0           | 0           |
| 0.05    | 1631                                                 | 1637        | 1642        | 1648        | 1654        | -1.800               | -1.750      | -1.699      | -1.650      | -1.603      |
| 0.10    | 1632                                                 | 1637        | 1643        | 1649        | 1655        | -2.582               | -2.493      | -2.406      | -2.321      | -2.242      |
| 0.15    | 1633                                                 | 1638        | 1644        | 1650        | 1656        | -2.705               | -2.599      | -2.496      | -2.397      | -2.304      |
| 0.20    | 1634                                                 | 1639        | 1645        | 1651        | 1657        | -2.472               | -2.367      | -2.265      | -2.168      | -2.077      |
| 0.25    | 1635                                                 | 1640        | 1646        | 1652        | 1658        | -2.080               | -1.988      | -1.898      | -1.813      | -1.733      |
| 0.30    | 1636                                                 | 1642        | 1647        | 1653        | 1659        | -1.638               | -1.564      | -1.492      | -1.423      | -1.359      |
| 0.35    | 1638                                                 | 1643        | 1649        | 1655        | 1661        | -1.191               | -1.137      | -1.085      | -1.035      | -0.988      |
| 0.40    | 1639                                                 | 1645        | 1650        | 1656        | 1662        | -0.755               | -0.722      | -0.689      | -0.657      | -0.628      |
| 0.45    | 1641                                                 | 1646        | 1652        | 1658        | 1664        | -0.335               | -0.321      | -0.307      | -0.293      | -0.281      |
| 0.50    | 1643                                                 | 1648        | 1654        | 1660        | 1666        | 0.059                | 0.057       | 0.055       | 0.052       | 0.049       |
| 0.55    | 1645                                                 | 1650        | 1656        | 1662        | 1668        | 0.415                | 0.399       | 0.382       | 0.365       | 0.349       |
| 0.60    | 1646                                                 | 1652        | 1658        | 1664        | 1670        | 0.710                | 0.682       | 0.654       | 0.626       | 0.600       |
| 0.65    | 1649                                                 | 1654        | 1660        | 1666        | 1672        | 0.920                | 0.885       | 0.849       | 0.813       | 0.780       |
| 0.70    | 1651                                                 | 1656        | 1662        | 1668        | 1674        | 1.026                | 0.986       | 0.946       | 0.906       | 0.869       |
| 0.75    | 1653                                                 | 1658        | 1664        | 1670        | 1676        | 1.013                | 0.974       | 0.933       | 0.893       | 0.856       |
| 0.80    | 1655                                                 | 1660        | 1666        | 1672        | 1678        | 0.884                | 0.848       | 0.811       | 0.774       | 0.740       |
| 0.85    | 1657                                                 | 1662        | 1668        | 1674        | 1680        | 0.658                | 0.629       | 0.599       | 0.569       | 0.540       |
| 0.90    | 1659                                                 | 1665        | 1670        | 1676        | 1682        | 0.380                | 0.361       | 0.339       | 0.319       | 0.298       |
| 0.95    | 1661                                                 | 1667        | 1672        | 1678        | 1684        | 0.123                | 0.114       | 0.104       | 0.093       | 0.083       |
| 1       | 1664                                                 | 1669        | 1675        | 1680        | 1686        | 0                    | 0           | 0           | 0           | 0           |

<sup>a</sup>  $x_1$  is the mole fraction of DMF (1) in the DMF (1) + *n*-propanol (2) mixtures.
